# Supplementary material for: Exploring the effects of lifestyle on breast cancer risk, age at diagnosis, and survival: the EBBA-Life study
Source: Springer Nature journal article supplement (doi:10.1007/s10549-020-05679-2), 2020-05-20
Supplement: MOESM1 [file 18000102]

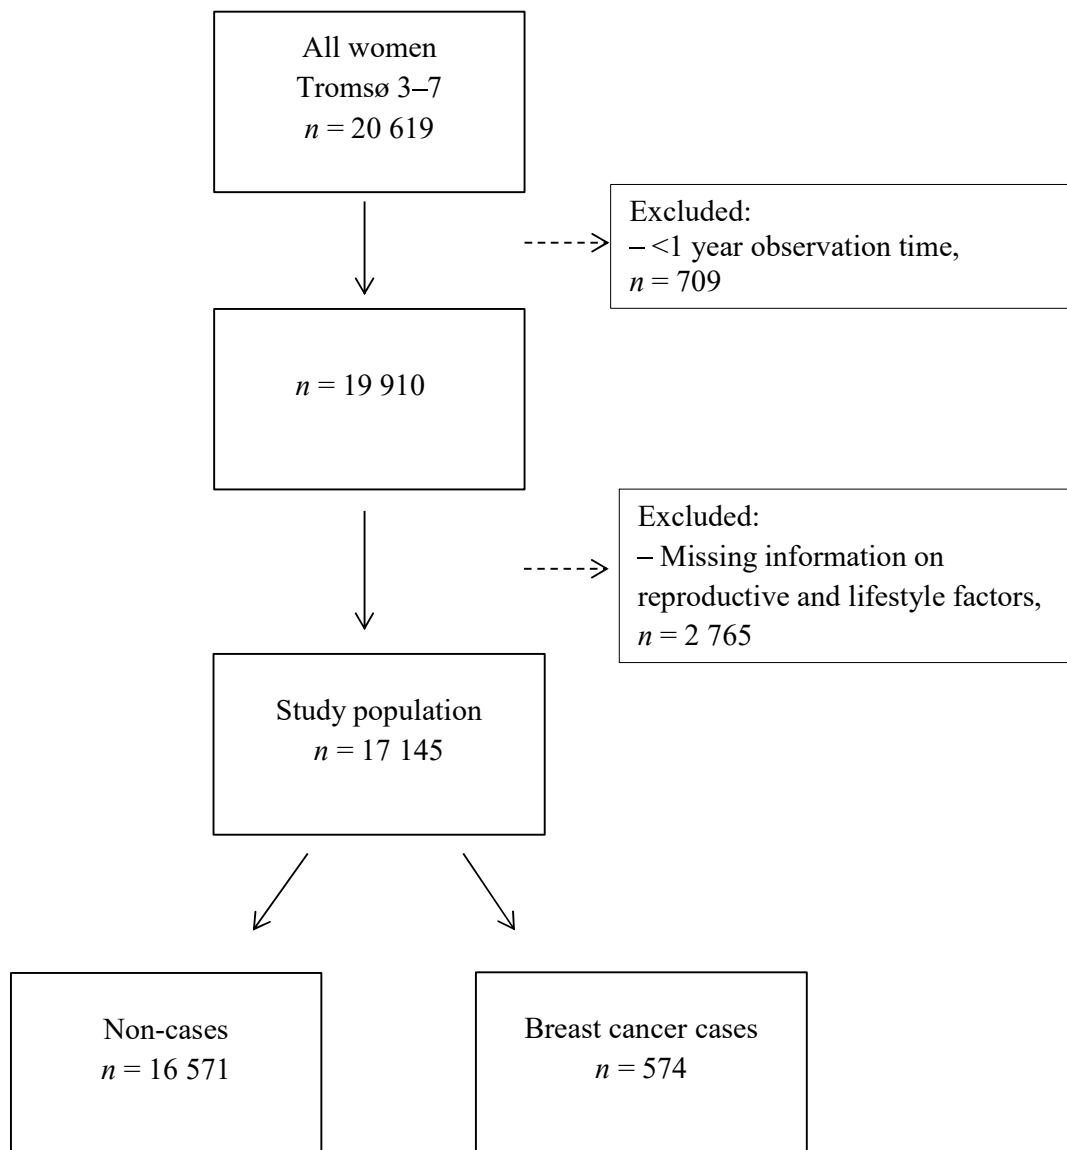

**Online Resource 1** Flow diagram for EBBA-Life study
