# Supplementary material for: Exploring the effects of lifestyle on breast cancer risk, age at diagnosis, and survival: the EBBA-Life study
Source: Springer Nature journal article supplement (doi:10.1007/s10549-020-05679-2), 2020-05-20
Supplement: MOESM3 [file 18000102]

**Online Resource 3** Age-adjusted hazard ratios between lifestyle and incident estrogen receptor-positive breast cancer by menopausal status at diagnosis

|                                                            | Premenopausal ER-positive breast cancer |                  | Postmenopausal ER-positive breast cancer |                  |               |                  |
|------------------------------------------------------------|-----------------------------------------|------------------|------------------------------------------|------------------|---------------|------------------|
|                                                            | <i>n</i> = 144                          | HR (95% CI)      | MHT non-users                            |                  | MHT users     |                  |
|                                                            |                                         |                  | <i>n</i> = 160                           | HR (95% CI)      | <i>n</i> = 58 | HR (95% CI)      |
| <i>Number of unfavorable lifestyle factors<sup>a</sup></i> |                                         |                  |                                          |                  |               |                  |
| 0 (ref)                                                    | 20                                      | 1.00             | 12                                       | 1.00             | 7             | 1.00             |
| 1                                                          | 52                                      | 1.03 (0.62–1.74) | 45                                       | 1.60 (0.85–3.02) | 21            | 1.37 (0.62–3.03) |
| 2                                                          | 47                                      | 0.92 (0.55–1.56) | 51                                       | 1.89 (1.01–3.56) | 17            | 1.45 (0.64–3.26) |
| 3–5                                                        | 25                                      | 0.87 (0.48–1.57) | 52                                       | 2.42 (1.27–4.63) | 13            | 1.61 (0.67–3.85) |
| <i>P</i> <sub>trend</sub>                                  |                                         | 0.475            |                                          | 0.004            |               | 0.312            |

Multivariable Cox's proportional hazard regression models.

<sup>a</sup>Unfavorable lifestyle factors: overweight, physical inactivity, alcohol use, smoking, and hypertension.

Adjusted to age (continuous), age at menarche (continuous), number of children (continuous),

Abbreviations: CI, confidence interval; ER, estrogen receptor; HR, hazard ratio; MHT, menopausal hormone therapy; *n*, number of cases; ref, reference
