# Supplementary material for: Exploring the effects of lifestyle on breast cancer risk, age at diagnosis, and survival: the EBBA-Life study
Source: Springer Nature journal article supplement (doi:10.1007/s10549-020-05679-2), 2020-05-20
Supplement: MOESM4 [file 18000102]

---

**Online Resource 4** Tumor characteristics<sup>a</sup> of postmenopausal breast cancer cases (MHT non-users)

---

|                                  | Number of unfavorable lifestyle factors |                                |                                |                                  | <i>P</i> |
|----------------------------------|-----------------------------------------|--------------------------------|--------------------------------|----------------------------------|----------|
|                                  | <b>0 (n=17)</b><br>Mean (SD)/%          | <b>1 (n=71)</b><br>Mean (SD)/% | <b>2 (n=72)</b><br>Mean (SD)/% | <b>3-5 (n=77)</b><br>Mean (SD)/% |          |
| <b>Tumor characteristics</b>     |                                         |                                |                                |                                  |          |
| Tumor size, mm                   | 15.9 (12.3)                             | 19.2 (11.9)                    | 22.6 (17.0)                    | 31.9 (28.5)                      | 0.022    |
| Number of metastatic lymph nodes | 1.67 (1.97)                             | 1.10 (2.27)                    | 2.65 (4.64)                    | 0.09 (0.30)                      | 0.108    |
| ER+, %                           | 75.0                                    | 78.1                           | 81.5                           | 89.9                             | 0.706    |
| PgR+, %                          | 43.8                                    | 58.1                           | 60.1                           | 50.0                             | 0.543    |
| HER2+, %                         | 6.3                                     | 16.1                           | 16.5                           | 23.5                             | 0.609    |
| Ki-67                            | 29.1 (17.5)                             | 19.2 (17.4)                    | 19.9 (16.4)                    | 16.5 (14.2)                      | 0.237    |
| Histological grade               | 2.06 (0.70)                             | 1.90 (0.73)                    | 1.96 (0.70)                    | 1.83 (0.74)                      | 0.771    |

---

One-way ANOVA.

<sup>a</sup>Numbers may vary due to missing information.

Abbreviations: ER, estrogen receptor; HER2, human epidermal growth factor receptor-2; MHT, menopausal hormone therapy; *n*, number of cases; PgR, progesterone receptor; SD, standard deviation.
